# Supplementary material
Source: MDPI journal article supplement (https://www.mdpi.com/2410-3888/4/2/27)

**Supplemental Figure 1.** Mean EOG responses relative to -5M L-serine standard measured in 3 Silver Carp. All prostaglandins were tested at nanomolar concentrations (PGE<sub>1α</sub>= prostaglandin E<sub>1α</sub>; PGE<sub>2α</sub>= prostaglandin E<sub>2α</sub>; 15K-PGF<sub>2α</sub>= 15keto-prostaglandin E<sub>2α</sub>; PGF<sub>1α</sub>= prostaglandin E<sub>1α</sub>; PGF<sub>1α</sub>= prostaglandin F<sub>1α</sub>; PGF<sub>2α</sub>= prostaglandin F<sub>2α</sub>; 15K-PGF<sub>2α</sub>= 15keto-prostaglandin F<sub>2α</sub>; dh15K-PGF<sub>2α</sub>= dihydro15keto-prostaglandin F<sub>2α</sub>; PGF<sub>3α</sub>= prostaglandin F<sub>3α</sub>).

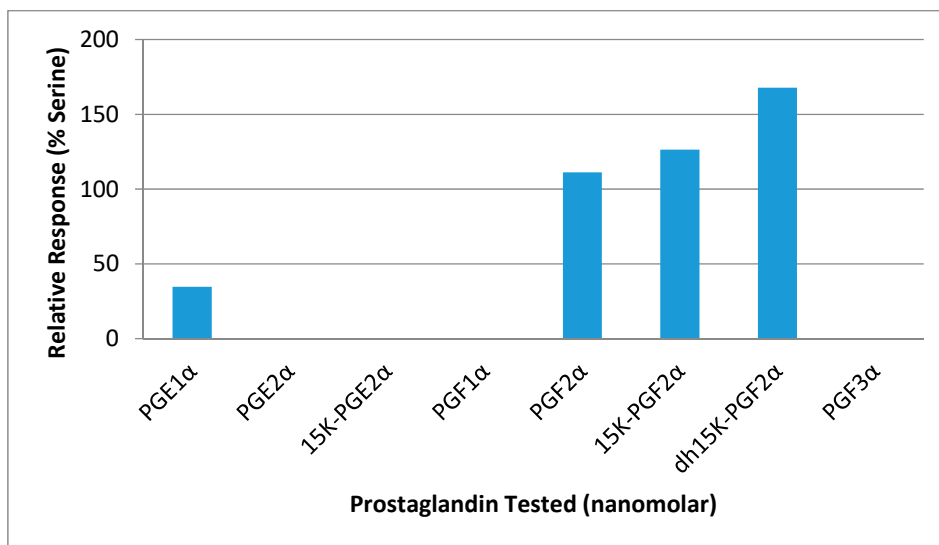

**Supplemental Figure 2.** Mean EOG responses from 5 MT-treated and 5 non-treated (control) silver carp to 3 PGFs at different concentrations. Responses are expressed relative to responses elicited by -5M L-serine standard and were measured after one year of daily MT treatment.

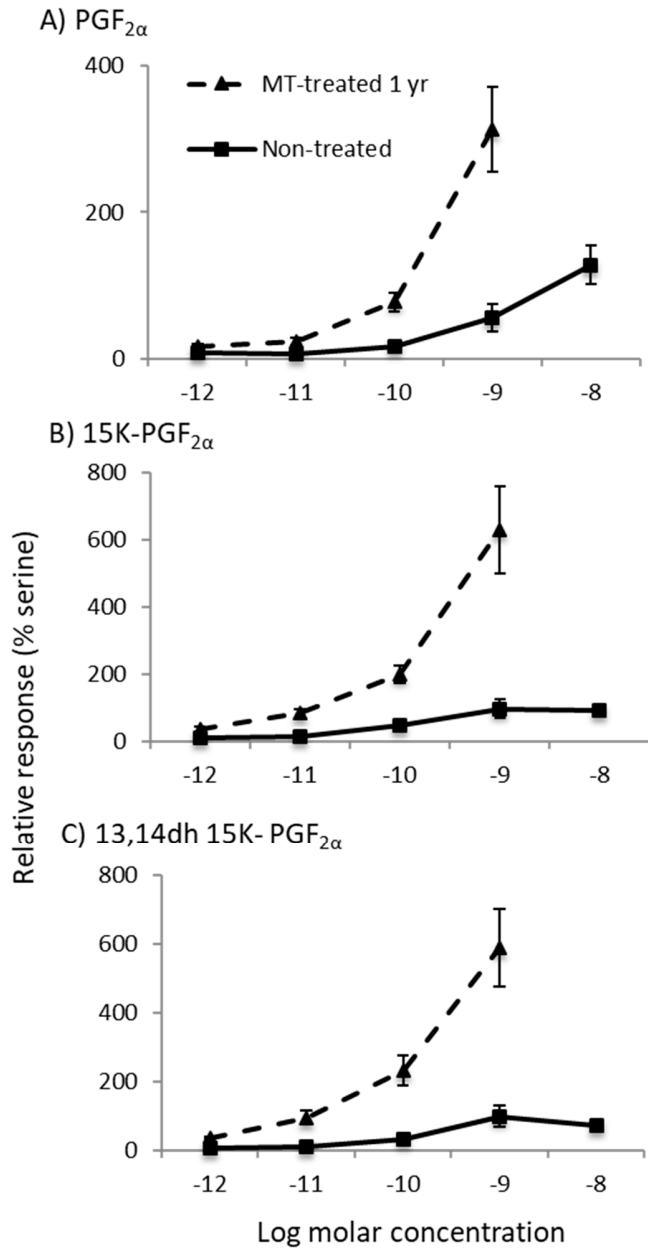

Supplement: s1 [file s1]
